# Supplementary material for: Influence of conformation isomers in alkyl chains on Ag(i)-coordinated supramolecular architectures
Source: Royal Society of Chemistry journal article supplement (doi:10.1039/d3nj00162h), 2023-01-01
Supplement: d3nj00162h1.pdf [file d3nj00162h1.pdf]

Electronic Supplementary Material (ESI)

**Influence of Ag(I)-coordinated supramolecular architectures by conformation isomers in alkyl chains**

Hyeon min Han,<sup>a</sup> Ka Young Kim,<sup>a</sup> Jong Hwa Jung,<sup>a,\*</sup> and Sung Ho Jung<sup>a,\*</sup>

*Contents*

|                                               |            |
|-----------------------------------------------|------------|
| <i>Methods</i> .....                          | <i>S2</i>  |
| <i>Material synthesis</i> .....               | <i>S3</i>  |
| <i>Supplementary Scheme and Figures</i> ..... | <i>S4</i>  |
| <i>References</i> .....                       | <i>S20</i> |

## Methods

**General characterization.** The  $^1\text{H}$  and  $^{13}\text{C}$  NMR spectra were taken on a Bruker DRX 300, and Bruker DRX 500. Mass spectroscopy samples were analyzed on a JEOL JMS-700 mass spectrometer. The high resolution mass spectra (HR MS) were measured by electrospray ionization (ESI) with a micro TOF Focus spectrometer from SYNAPT G2 (Waters, U.K.). A UV-visible spectrophotometer (Jasco V-750) was used to obtain the absorption spectra. IR spectra were observed over the range  $500\text{-}4000\text{ cm}^{-1}$ , with a Thermo scientific Nicolet iS 10 instrument. Powder X-ray pattern (XRD) was recorded on a Rigaku model NANOPIX X-ray diffractometer with a  $\text{Cu K}_\alpha$  radiation source.

**Preparation of silver complexes.** Different concentrations (0.5 and 1.0 equiv.) of  $\text{Ag}^+$  solution (water) were added to the ligand *trans*-**L** and *cis*-**L** (6.0 mM) solution in a mixture of DMSO and  $\text{H}_2\text{O}$  (4:1 v/v).

**SEM observation.** FE-SEM images were observed using a JEOL (JSM-7900F). The images of samples using an accelerating voltage 10 kV and an emission current of  $8\mu\text{A}$ . Samples were prepared by dropping dilute solution of supramolecular nanostructure formed in a mixture of DMSO and  $\text{H}_2\text{O}$  (4:1 v/v) on glasses following by spinning, drying and coating them with a thin layer of Pt to increase the contrast.

**Circular dichroism studies.** The CD and UV-vis spectra were recorded on a Jasco J-815 CD spectrophotometer. CD and UV-vis spectra were determined over the range of 200-500 nm using a quartz cell with 0.1 mm path length. Scans were taken at rate of 500 nm/min with a sampling interval of 0.5 nm and response time of 0.5s. The scans were acquired for the supramolecular nanostructure directly at  $25\text{ }^\circ\text{C}$ .

**Calculation of thermodynamic parameter.** The thermodynamic parameters governing the supramolecular aggregation of *trans*-**L** and *cis*-**L** were obtained by the global fitting of the melting curves. This global fitting is performed by using the equilibrium (EQ) model reported by ten Eikelder and coworkers.<sup>1</sup> The values for the elongation enthalpy ( $\Delta H_e$ ) and the entropy ( $\Delta S_e$ ), and elongation binding constant ( $K_e$ ) used in the cooperative supramolecular polymerization models were determined by the global fitting of the heating curves,<sup>2-4</sup> which were obtained by plotting the degree of aggregation ( $\alpha_{\text{agg}}$ ) of *trans*-**L** and *cis*-**L** (6 mM) without and with  $\text{AgNO}_3$  (0.5 equiv.) at 275 nm against temperature with heating experiments. An elongation binding constant ( $K_e$ ) for aggregation at 293 K was estimated according to eq. 1, from which the enthalpy change ( $\Delta H$ ), and the entropy change ( $\Delta S$ ) were determined:

$$K_e = e^{-(\Delta H_e - T\Delta S)/RT} \quad (\text{eq. 1})$$

## Material synthesis

*trans*-L and *cis*-L were synthesized according to the procedure shown in Scheme S1. All chemical reagents were purchased commercially without further purification, unless otherwise noted.

**Synthesis of compound L.** (*R*)-(-)-2-amino-1-propanol (0.28 g, 3.7 mmol) was put into a stirred suspension of powdered KOH (1.05 g, 18.7 mmol) in dry DMSO (20 mL) at 60 °C. After 30 min, 4'-chloro-2,2':6',2''-terpyridine (1.00 g, 3.7 mmol) was put into the mixture. The mixture was then stirred for 4 h at 70 °C and poured into 600 mL of distilled water thereafter. CH<sub>2</sub>Cl<sub>2</sub> (3 × 200 mL) was used to extract the aqueous phase. Residual water in dichloromethane was dried over Na<sub>2</sub>SO<sub>4</sub> and CH<sub>2</sub>Cl<sub>2</sub> was removed in vacuum, and the desired product was purified by recrystallization with ethyl acetate. Yield: 72%; Mp = 118.3 °C; IR (KBr pellet): 3375, 2964, 2926, 2846, 1577, 1565, 1473, 1439, 1403, 1353, 1204, 799 cm<sup>-1</sup>; <sup>1</sup>H NMR (300 MHz, DMSO-d<sub>6</sub>): δ 8.70 (tdd, *J* = 4.8, 1.8, 0.9 Hz, 2H), 8.62 (dt, *J* = 8.0, 1.1 Hz, 2H), 8.02 (s, 2H), 7.84 (td, *J* = 7.7, 1.8 Hz, 2H), 7.33 (ddd, *J* = 7.4, 4.8, 1.2 Hz, 2H), 4.14 (dd, *J* = 9.0, 4.1 Hz, 1H), 3.94 (dd, *J* = 9.1, 7.6 Hz, 1H), 3.41 (dddd, *J* = 10.6, 7.6, 6.6, 4.2 Hz, 1H), 1.21 (d, *J* = 6.5 Hz, 3H); <sup>13</sup>C NMR (125 MHz, DMSO-d<sub>6</sub>): δ 167.2, 157.1, 155.3, 149.7, 137.9, 125.0, 121.3, 107.3, 75.1, 46.2, 20.43; HR-Mass (*m/z*) calculated for C<sub>18</sub>H<sub>18</sub>N<sub>4</sub>O [M]<sup>+</sup>: 306.3690, Found [M]<sup>+</sup>: 306.3690.

**Synthesis of compound *trans*-L.** L (0.5 g, 2 mmol), elaidic acid (0.5 g, 2 mmol), SOCl<sub>2</sub> (1 mL, 20 mmol), and triethylamine (TEA, 2.5 mL, 20 mmol) were added to a 50-mL flask. Anhydrous toluene (10 mL) was then injected, and the reaction mixture was stirred for 2 hours at 80 °C. Then solvents were removed using a rotary evaporator. After the crude product was partitioned in CH<sub>2</sub>Cl<sub>2</sub>/H<sub>2</sub>O, the organic layer was separated and dried over Na<sub>2</sub>SO<sub>4</sub>. Then, the organic solvent was removed using a rotary evaporator. The desired product was recrystallized from ethyl ether and MeOH. Yield: 52%; <sup>1</sup>H NMR (300 MHz, DMSO-d<sub>6</sub>) δ 8.71 (ddd, *J* = 4.8, 1.8, 0.9 Hz, 2H), 8.62 (dt, *J* = 8.0, 1.1 Hz, 2H), 8.06 – 7.96 (m, 4H), 7.89 (d, *J* = 7.4 Hz, 1H), 7.50 (ddd, *J* = 7.5, 4.8, 1.2 Hz, 2H), 5.36 – 5.18 (m, 2H), 4.32 – 4.06 (m, 3H), 2.07 (t, *J* = 7.2 Hz, 2H), 1.85 (dd, *J* = 13.1, 5.5 Hz, 4H), 1.47 (s, 2H), 1.21 (d, *J* = 5.5 Hz, 24H), 0.84 (s, 3H); HR-Mass (*m/z*): Calculated for C<sub>36</sub>H<sub>50</sub>N<sub>4</sub>O<sub>2</sub> [M]<sup>+</sup> 571.401, Found [M]<sup>+</sup> 571.4018 and [M+H]<sup>+</sup> 572.4050.

**Synthesis of compound *cis*-L.** L (0.25 g, 0.8 mmol), oleoyl chloride (0.36 g, 1.2 mmol), and triethylamine (TEA, 2.5 mL, 20 mmol) were added to a 50 mL flask. Anhydrous CH<sub>2</sub>Cl<sub>2</sub> (10 mL) was then injected, and the reaction mixture was stirred for 1 days at room temperature. Then solvents were

removed using a rotary evaporator. After the crude product was partitioned in  $\text{CH}_2\text{Cl}_2/\text{H}_2\text{O}$ , the organic layer was separated and dried over  $\text{Na}_2\text{SO}_4$ . Then, the organic solvent was removed using a rotary evaporator.  $^1\text{H}$  NMR (300 MHz,  $\text{DMSO}-d_6$ )  $\delta$  8.76 – 8.57 (m, 4H), 8.07 – 7.86 (m, 6H), 7.50 (ddd,  $J = 7.5, 4.8, 1.2$  Hz, 2H), 5.31 – 5.19 (m, 2H), 4.28 – 4.12 (m, 3H), 2.07 (t,  $J = 7.1$  Hz, 2H), 1.89 (dd,  $J = 10.5, 5.8$  Hz, 4H), 1.47 (s, 2H), 1.21 (d,  $J = 6.7$  Hz, 23H), 0.88 – 0.77 (m, 4H); HR-Mass ( $m/z$ ): Calculated for  $\text{C}_{36}\text{H}_{50}\text{N}_4\text{O}_2$   $[\text{M}]^+$  571.401, Found  $[\text{M}]^+$  571.4017 and  $[\text{M}+\text{H}]^+$  572.4047.

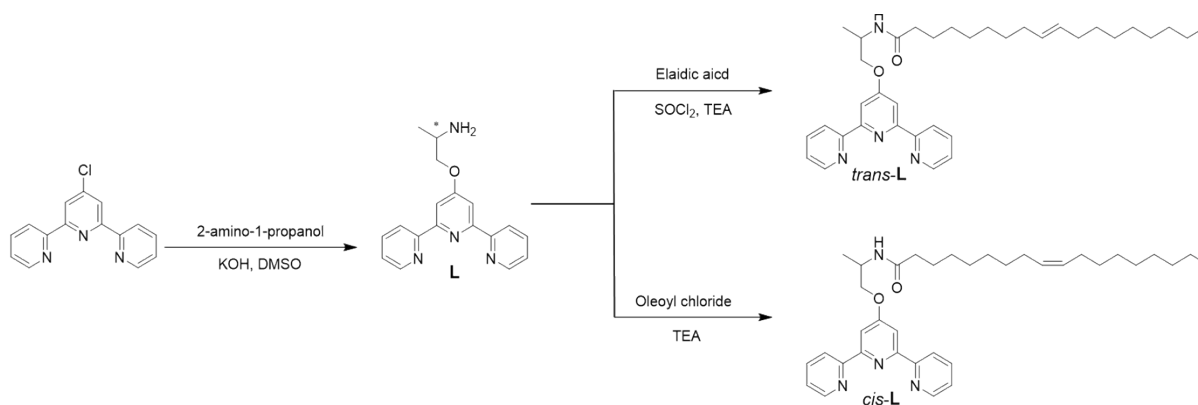

**Scheme S1** Synthetic method of *trans*-L and *cis*-L

**Table S1.** Thermodynamic parameters of *trans*- and *cis*-L with AgNO<sub>3</sub> (0.5 equiv.) in a mixture of DMSO/H<sub>2</sub>O (4:1 v/v) after 72 h.

|              | $\Delta G$ (kJ mol <sup>-1</sup> ) | $\Delta H_e$ (kJ mol <sup>-1</sup> ) | $\Delta S$ (J K <sup>-1</sup> mol <sup>-1</sup> ) | $K_e$ (L mol <sup>-1</sup> ) | $T_e$ (K) |
|--------------|------------------------------------|--------------------------------------|---------------------------------------------------|------------------------------|-----------|
| <b>trans</b> | -18.87                             | -39.98                               | -70.84                                            | $2.0 \times 10^3$            | 352.64    |
| <b>cis</b>   | -18.02                             | -64.05                               | -154.46                                           | $1.4 \times 10^3$            | 325.15    |

<sup>a</sup>Gibbs free energy. <sup>b</sup>Elongation enthalpy. <sup>c</sup>Entropy. <sup>d</sup>Elongation binding constant. <sup>e</sup>Elongation Temperature.

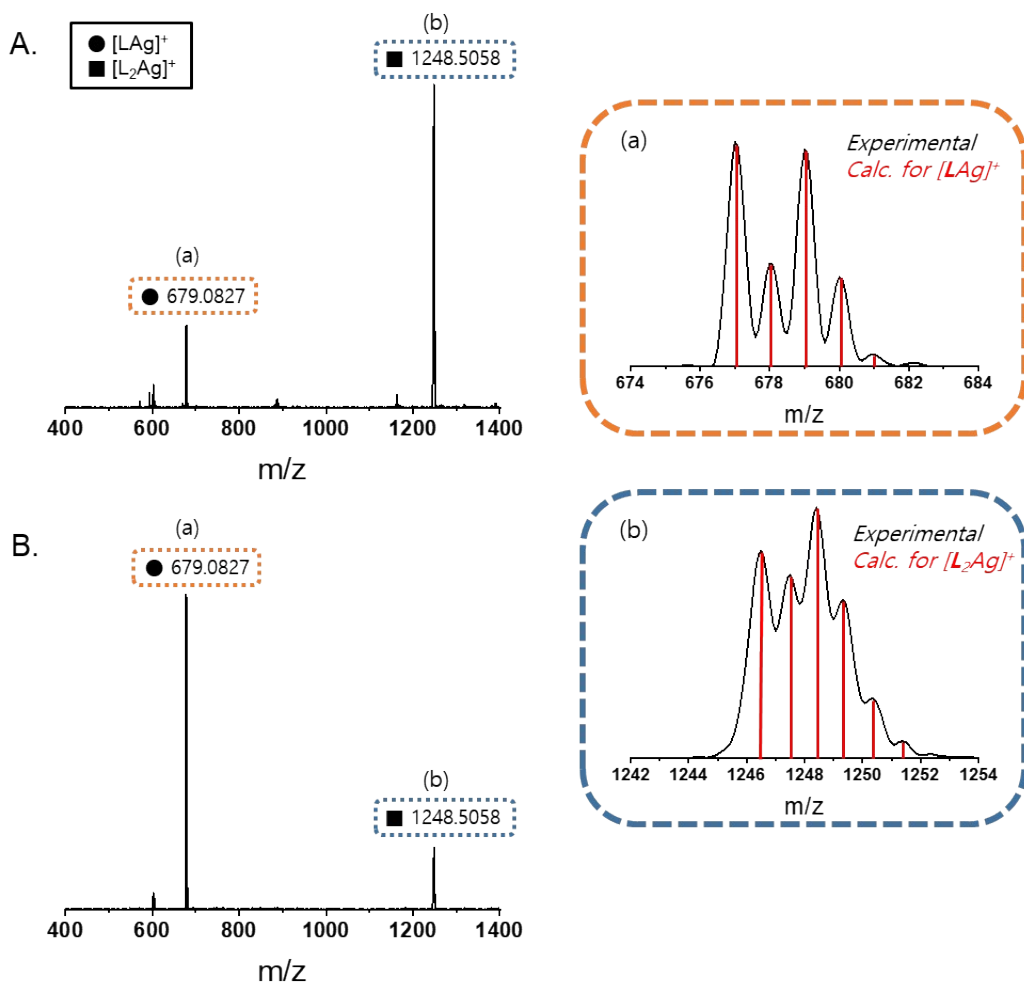

**Fig. S1** HR-ESI-MS spectra of *trans*-**L** (6.0 mM) with AgNO<sub>3</sub> (A) 0.5 equiv. and (B) 1.0 equiv. in H<sub>2</sub>O and DMSO (1:4 v/v) after 10 h.

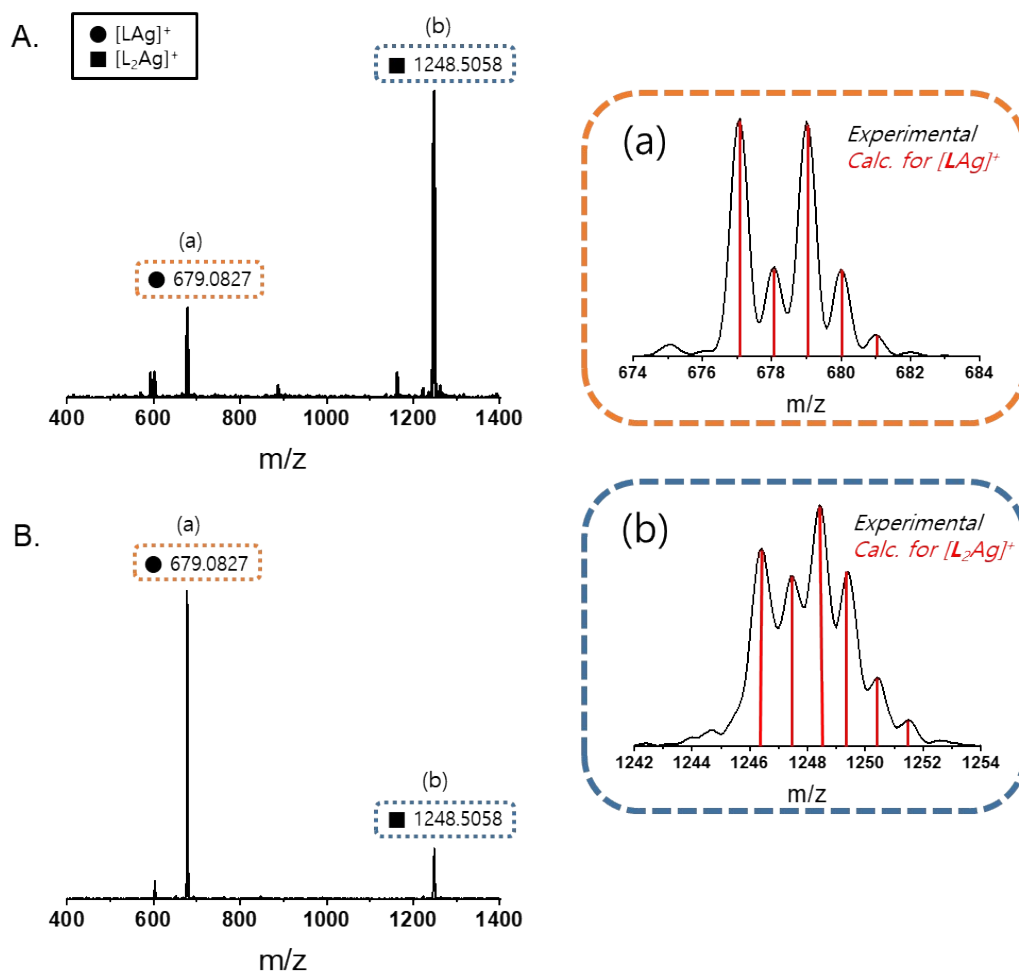

**Fig. S2** HR-ESI-MS spectra of *cis*-L (6.0 mM) with AgNO<sub>3</sub> (A) 0.5 equiv. and (B) 1.0 equiv. in H<sub>2</sub>O and DMSO (1:4 v/v) after 10 h.

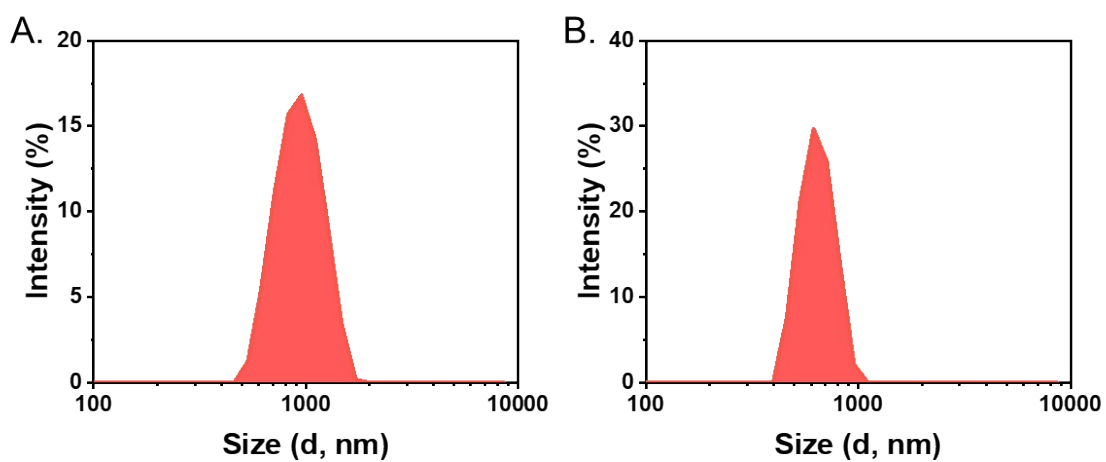

**Fig. S3** Intensity percentage dynamic light scattering size distributions of (A) *trans*-L and (B) *cis*-L (6.0 mM) with AgNO<sub>3</sub> (0.5 equiv.) in a mixed H<sub>2</sub>O and DMSO (1:4 v/v) after 72 h. Since DLS will consider the supramolecular architectures as spherical aggregates and hence the obtained values will not be accurate and can only be utilized to show the trend.



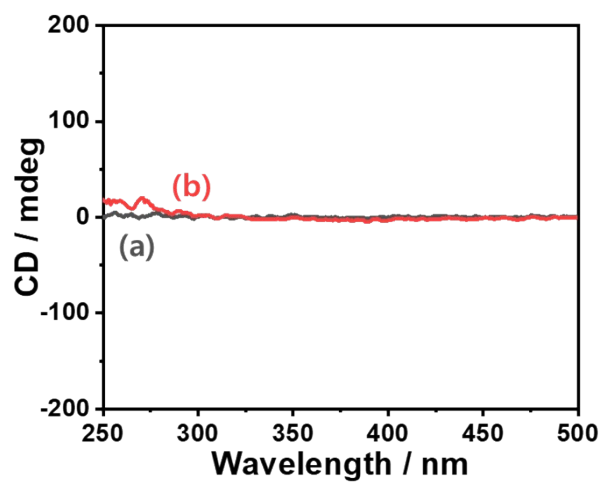

**Fig. S4** CD spectra of *cis*-L (6.0 mM) with AgNO<sub>3</sub> (a) 0.5 equiv. and (b) 1.0 equiv. in H<sub>2</sub>O and DMSO (1:4 v/v).

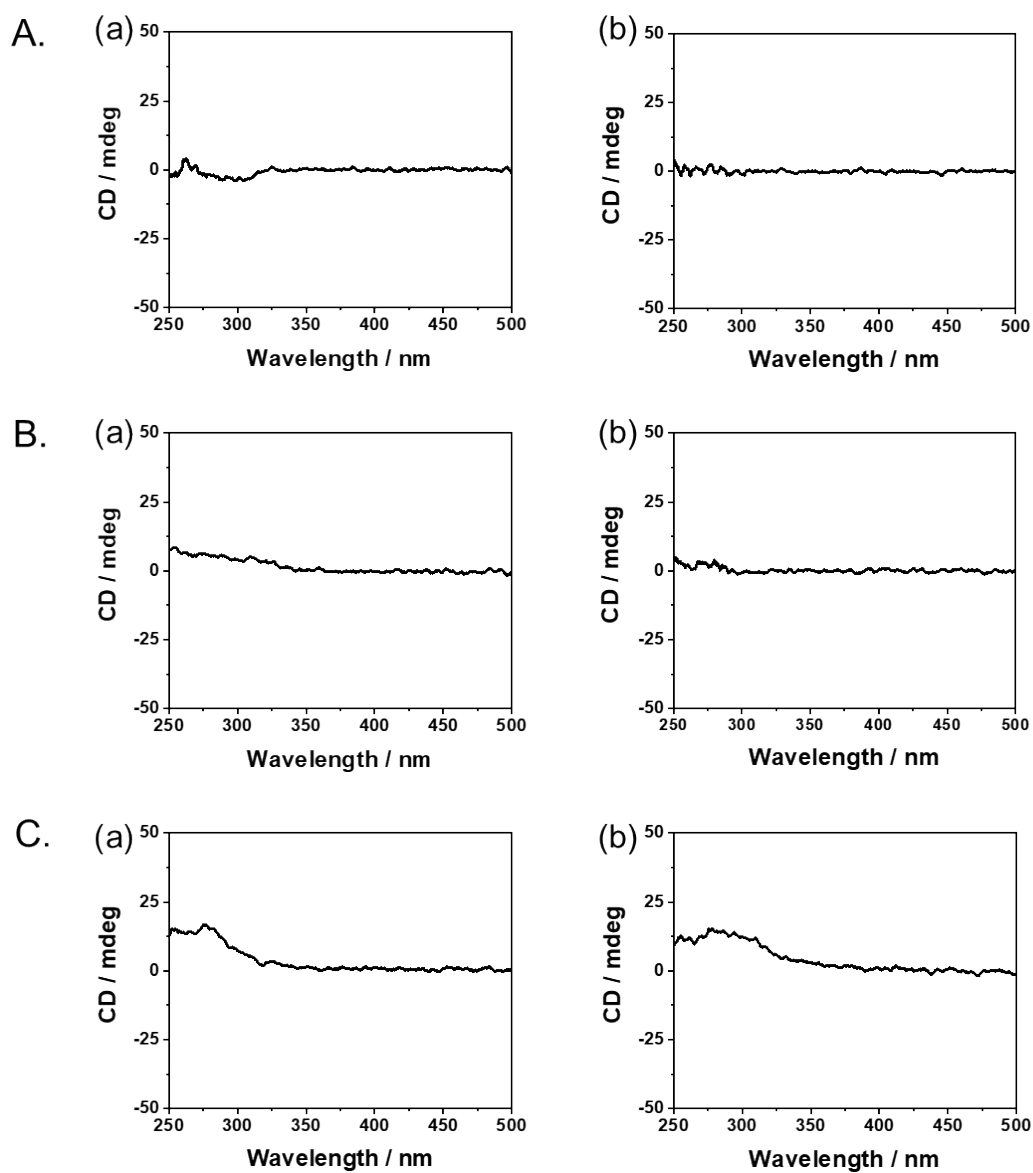

**Fig. S5** CD spectra of *cis*-L (6.0 mM) with  $\text{AgNO}_3$  (a) 0.5 equiv. and (b) 1.0 equiv. in (A) MeOH, (B)  $\text{H}_2\text{O}$  and DMSO (1:1 v/v) and (C)  $\text{H}_2\text{O}$  and DMSO (2:1 v/v).

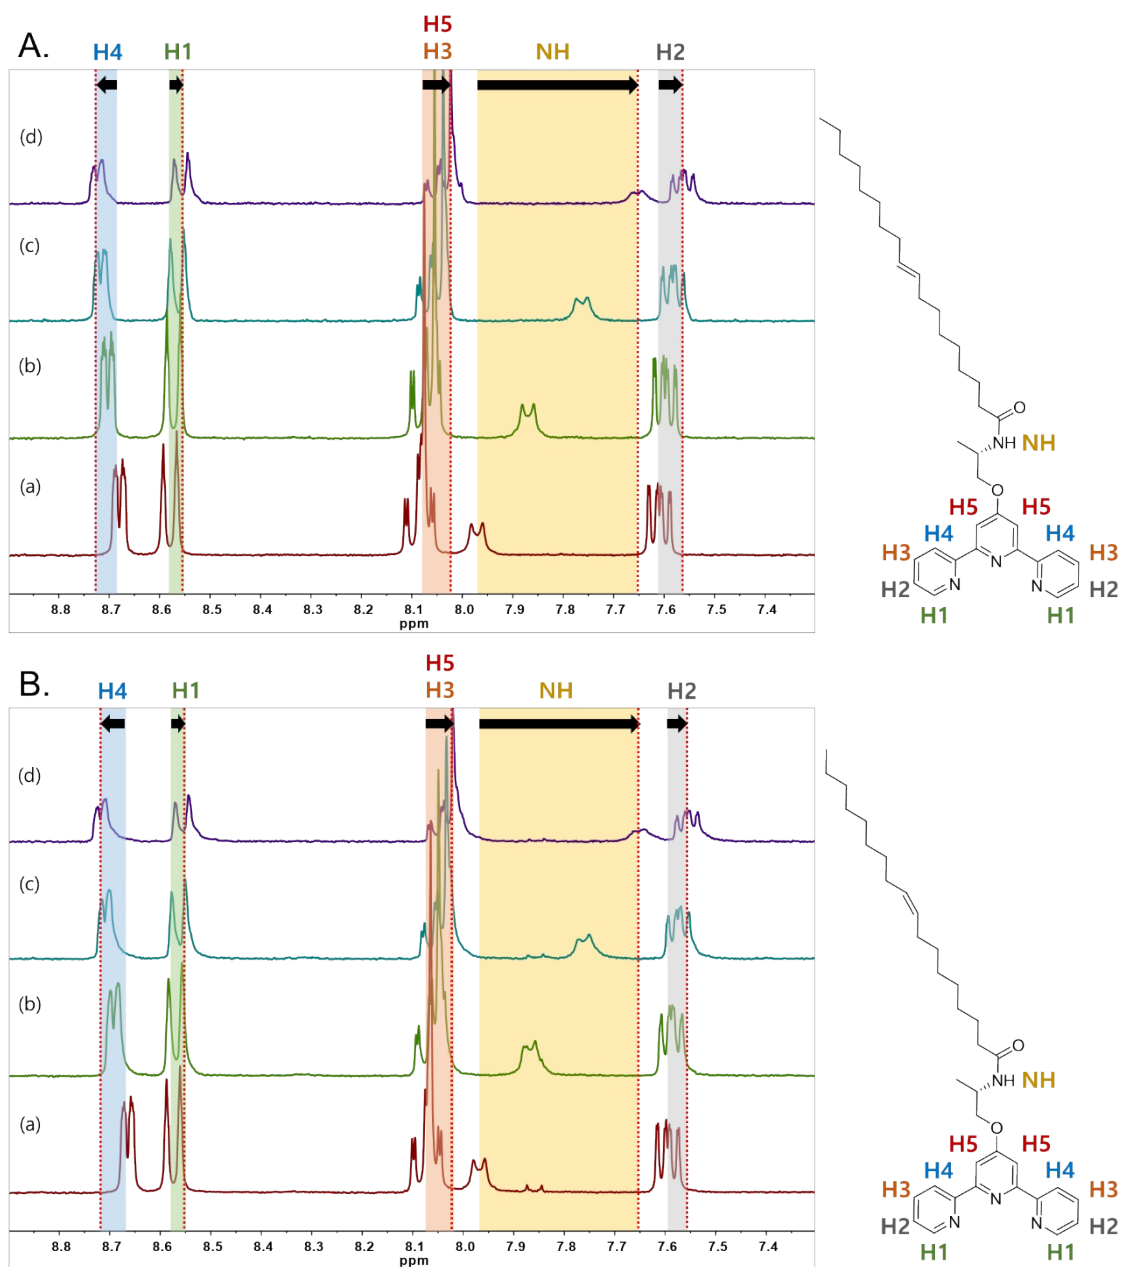

**Fig. S6** Temperature-dependent  $^1\text{H}$  NMR spectra of (A) *trans*-L and (B) *cis*-L with  $\text{AgNO}_3$  (0.5 equiv.) in  $\text{D}_2\text{O}$  and  $\text{DMSO-d}_6$  (1:4 v/v); (a) 293 K, (b) 313 K, (c) 333 K, (d) 353 K.

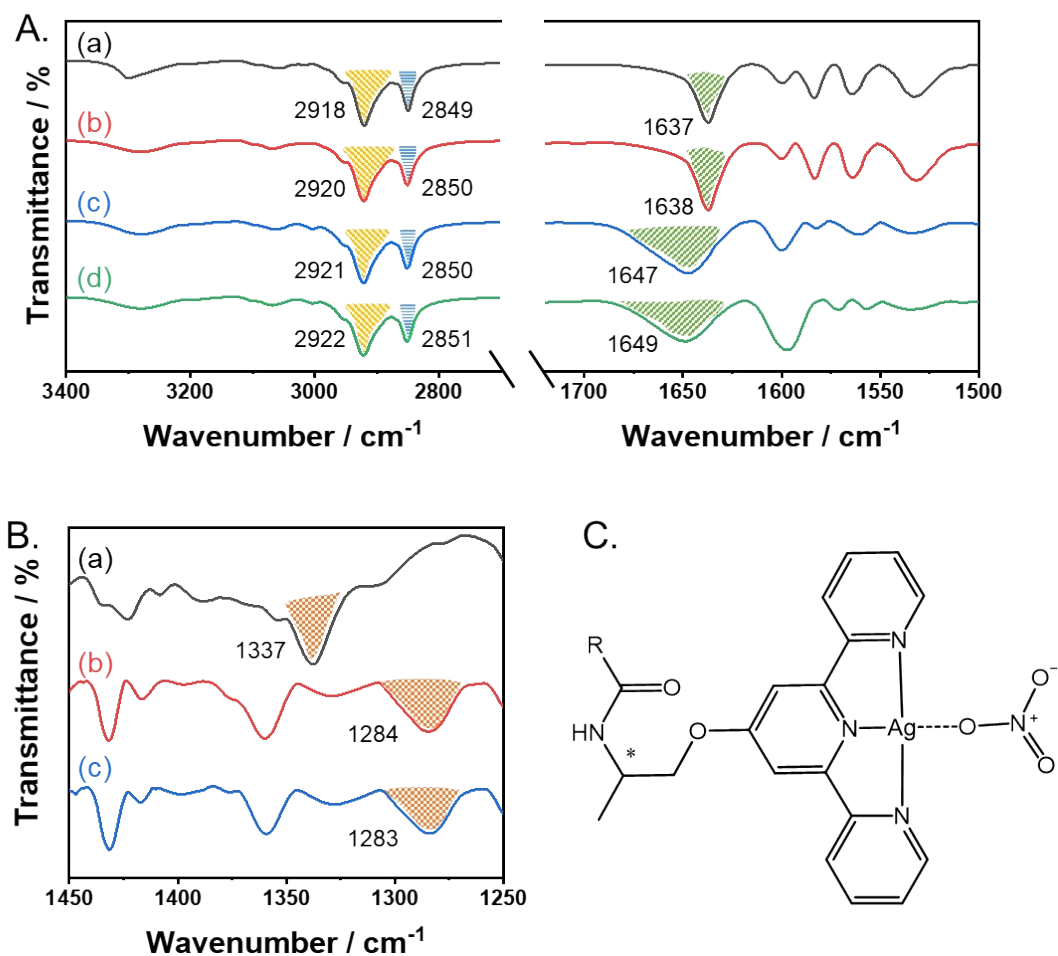

**Fig. S7** (A) FT-IR spectra of (a) *trans*-**L** and (b) *cis*-**L**, (c) *trans*-**L** + AgNO<sub>3</sub> (0.5 equiv.), and (d) *cis*-**L** + AgNO<sub>3</sub> (0.5 equiv.). (B) FT-IR spectra of (a) AgNO<sub>3</sub> (black line), (b) *trans*-**L** + AgNO<sub>3</sub> (0.5 equiv.; red line) (c) *cis*-**L** + AgNO<sub>3</sub> (0.5 equiv.; blue line). (C) Proposed complex structure of *trans*-**L** or *cis*-**L** with AgNO<sub>3</sub>.

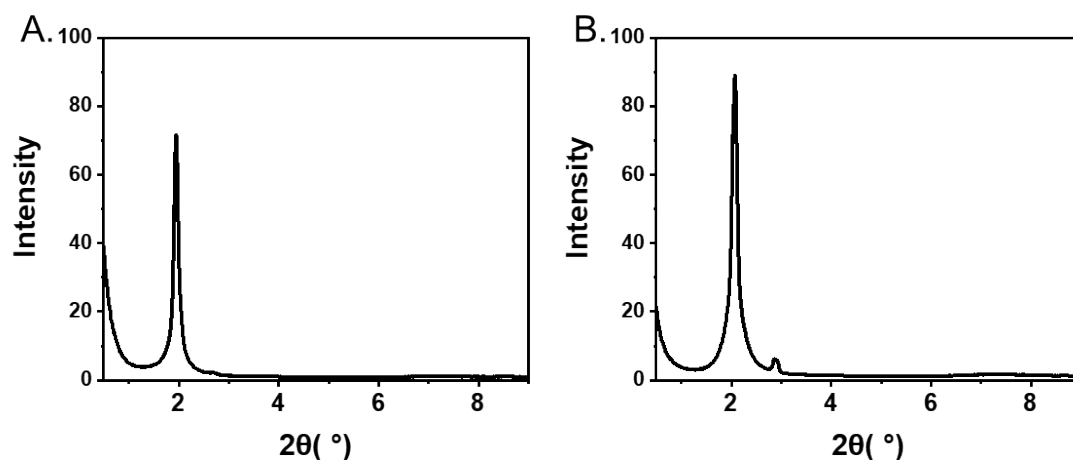

**Fig. S8** SAXS patterns of (A) *trans*-L and (B) *cis*-L (6.0 mM) with  $\text{AgNO}_3$  (0.5 equiv.) in a mixed  $\text{H}_2\text{O}$  and DMSO (1:4 v/v) after 72 h.

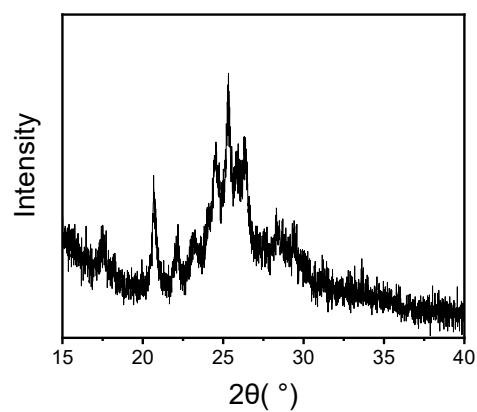

**Fig. S9** WARD pattern of *trans*-L (6.0 mM) with AgNO<sub>3</sub> (0.5 equiv.) in a mixed H<sub>2</sub>O and DMSO (1:4 v/v) after 72 h.

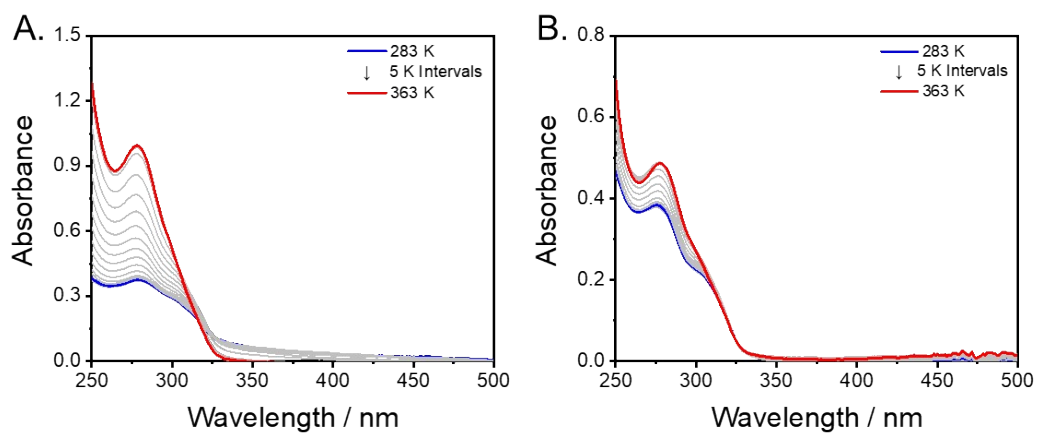

**Fig. S10** Temperature-dependent UV spectra of (A) *trans*- and (B) *cis*-L (6.0 mM) with AgNO<sub>3</sub> (0.5 equiv.) in H<sub>2</sub>O and DMSO (1:4 v/v).

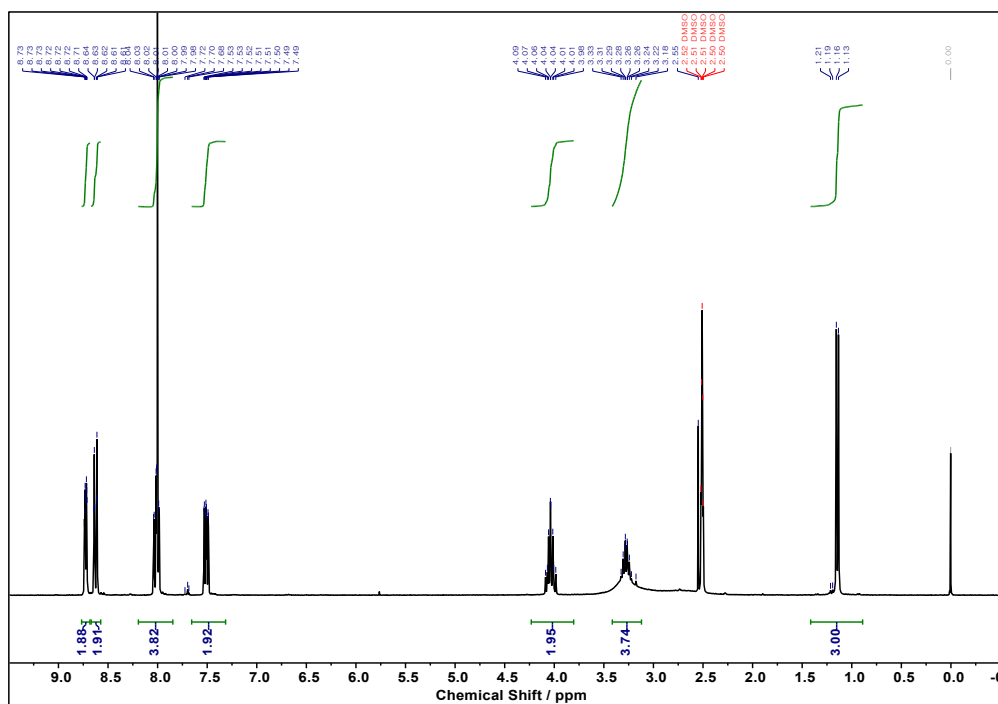

Fig. S11  $^1\text{H}$  NMR spectrum (300 MHz) of L in  $\text{DMSO-}d_6$  at 25  $^\circ\text{C}$ .

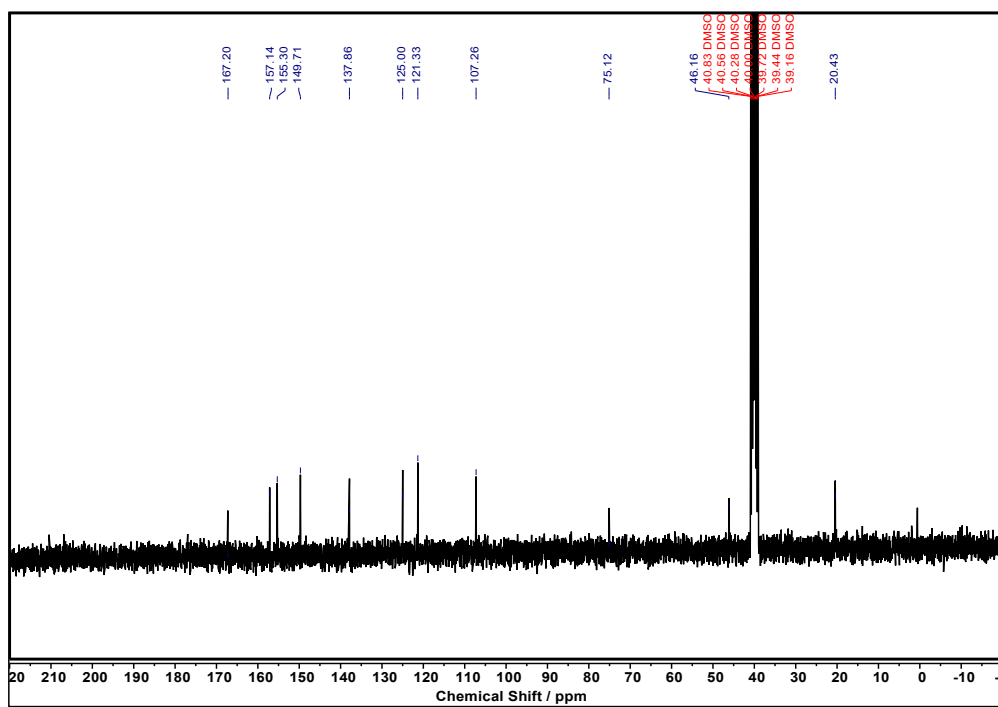

Fig. S12  $^{13}\text{C}$  NMR spectrum (125 MHz) of L in  $\text{DMSO-}d_6$  at 25  $^\circ\text{C}$ .



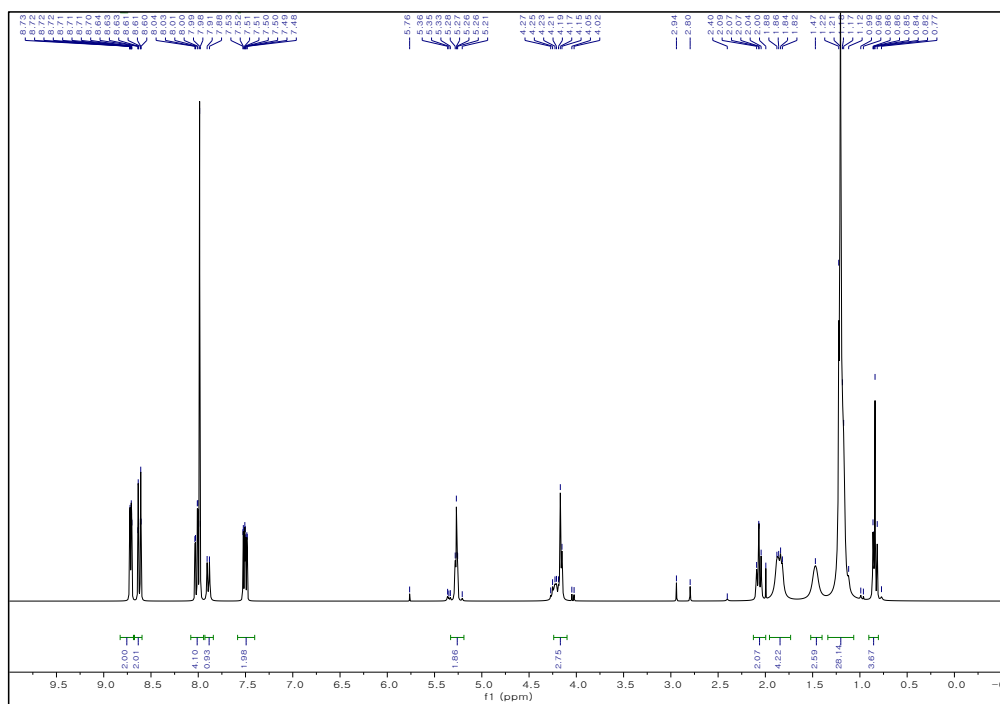

**Fig. S13**  $^1\text{H}$  NMR spectrum (300 MHz) of *trans*-L in  $\text{DMSO-}d_6$  at 25 °C.

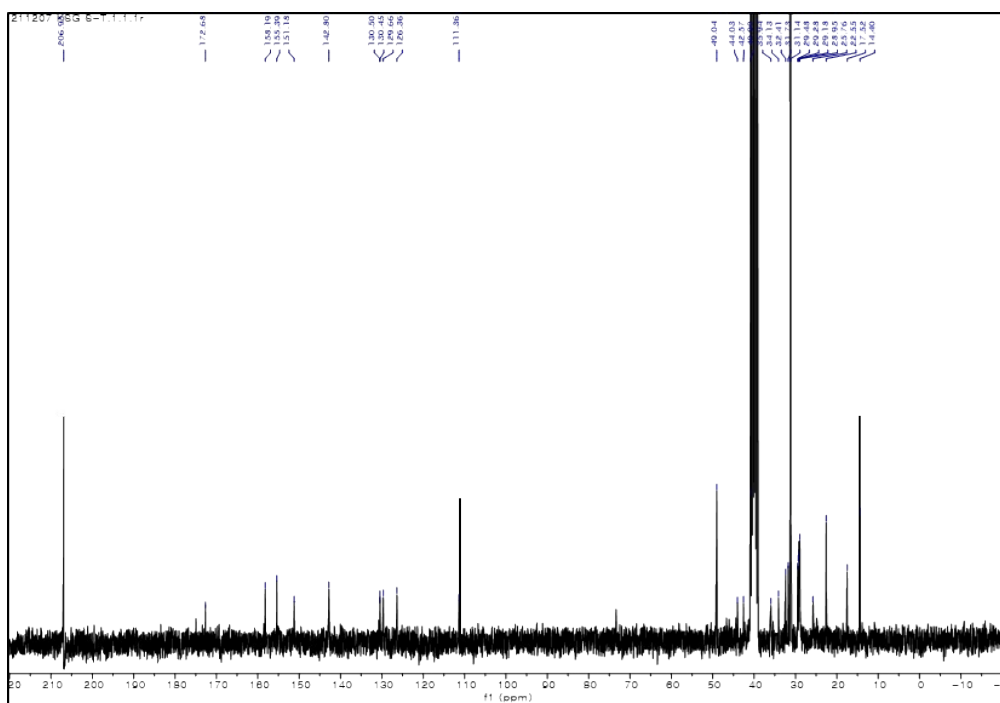

**Fig. S14**  $^{13}\text{C}$  NMR spectrum (75 MHz) of *trans*-L in  $\text{DMSO-}d_6$  at 25 °C.

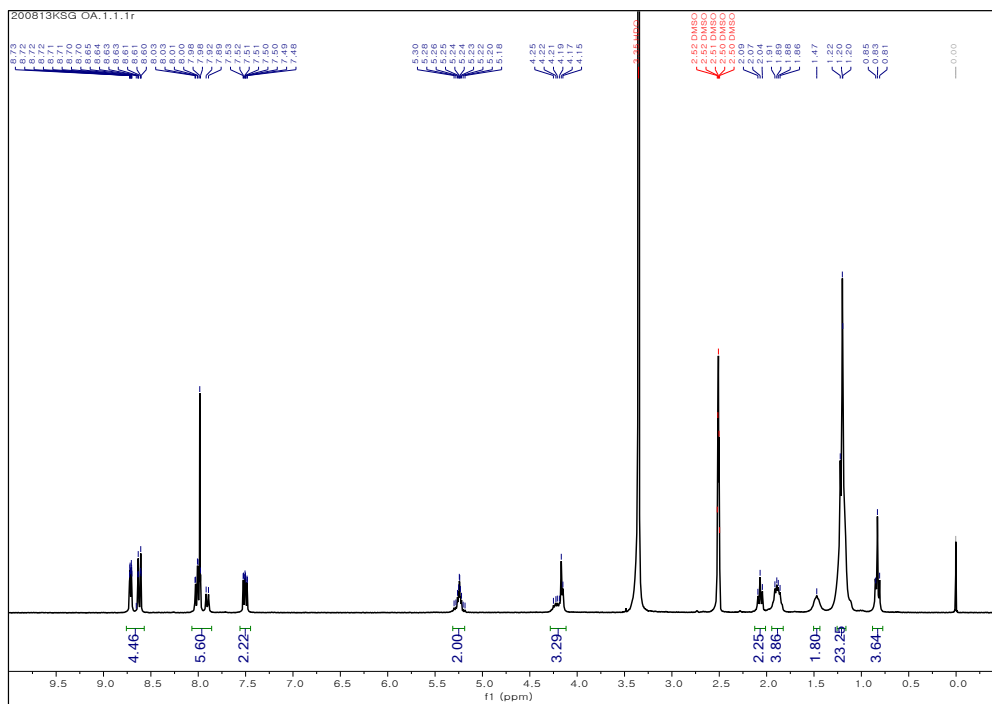

Fig. S15  $^1\text{H}$  NMR spectrum (300 MHz) of *cis*-L in  $\text{DMSO-}d_6$  at 25 °C.

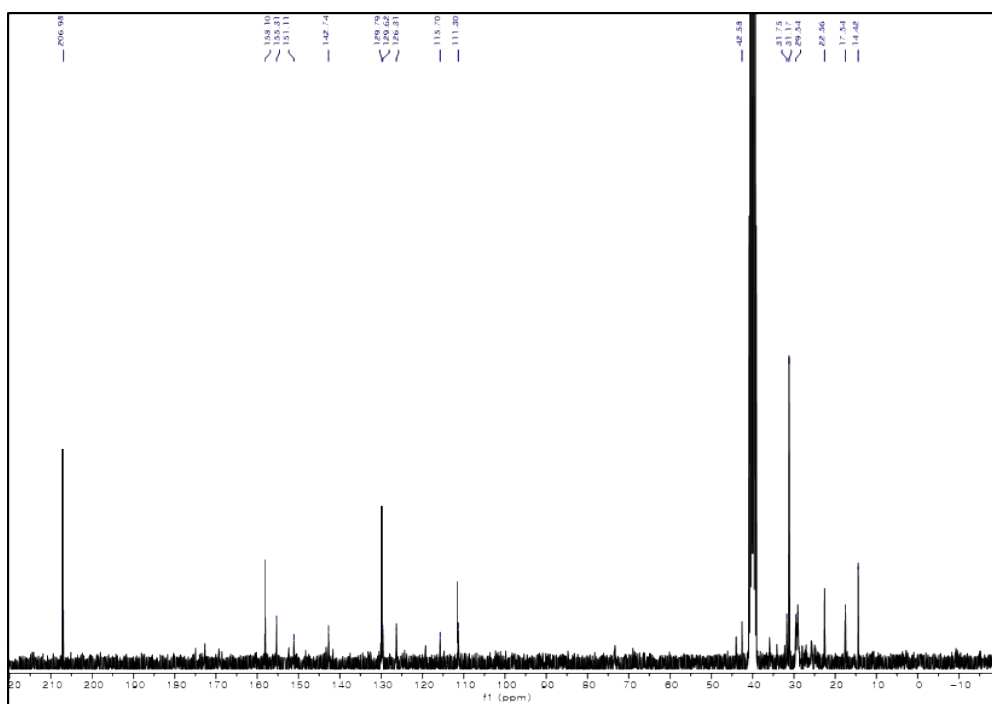

Fig. S16  $^{13}\text{C}$  NMR spectrum (75 MHz) of *cis*-L in  $\text{DMSO-}d_6$  at 25 °C.

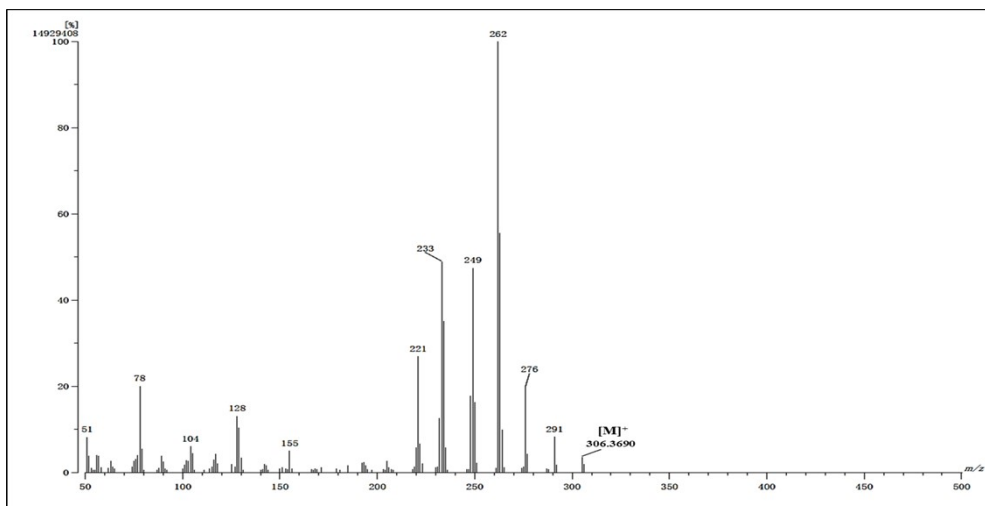

**Fig. S17** HR EI-MS spectrum of **L** in MeOH.

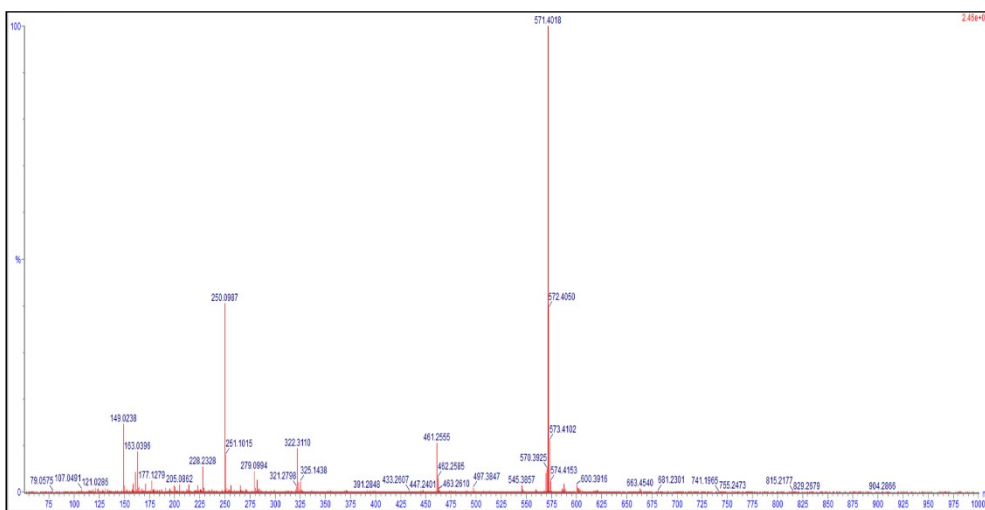

**Fig. S18** HR FAB-MS spectrum of *trans*-L in MeOH.

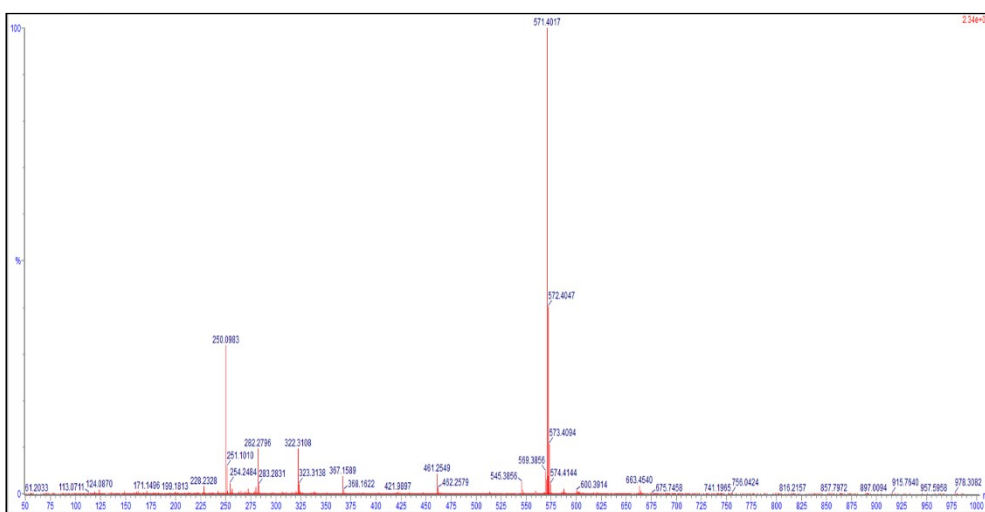

**Fig. S19** HR FAB-MS spectrum of *cis*-L in MeOH.

## References

1. H. M. M. ten Eikelder, A. J. Markvoort, T. F. A. de Greef and P. A. J. Hilbers, *J. Phys. Chem. B*, 2012, **116**, 5291-5301.
2. M. M. J. Smulders, M. M. L. Nieuwenhuizen, T. F. A. de Greef, P. van der Schoot, A. P. H. J. Schenning and E. W. Meijer, *Chem. Eur. J.*, 2010, **16**, 362-367.
3. H. Choi, S. Ogi, N. Ando and S. Yamaguchi, *J. Am. Chem. Soc.*, 2021, **143**, 2953-2961.
4. M. H.-Y. Chan, M. Ng, S. Y.-L. Leung, W. H. Lam and V. W.-W. Yam, *J. Am. Chem. Soc.*, 2017, **139**, 8639-8645.
